# Supplementary material for: Mechanism of thienopyridone and iminothienopyridinedione inhibition of protein phosphatases
Source: Royal Society of Chemistry journal article supplement (doi:10.1039/c9md00175a), 2019-01-01
Supplement: c9md00175a1.pdf [file c9md00175a1.pdf]

## Supporting Information

### **Mechanism of thienopyridone and iminothienopyridinedione inhibition of protein phosphatases**

Zhidian Zhang,<sup>a</sup> Guennadi Kozlov,<sup>a</sup> Yu Seby Chen,<sup>a</sup> and Kalle Gehring<sup>a</sup>

*<sup>a</sup>Department of Biochemistry and Centre for Structural Biology, McGill  
University, Montreal, Quebec, Canada, e-mail: kalle.gehring@mcgill.ca*

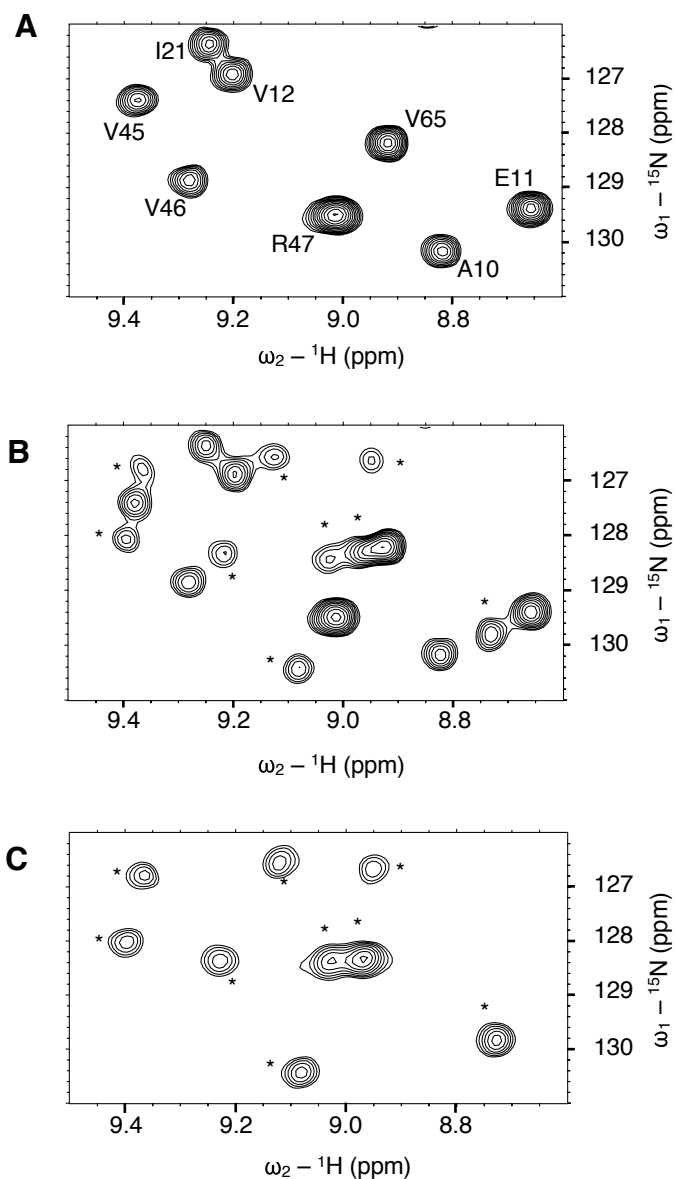

**Figure S1. Titration of PRL-3 with TP.**  $^{15}\text{N}$ - $^1\text{H}$  correlation spectra of reduced human PRL-3 (0.2 mM) in the absence of TP (A), in the presence of 1:2 (B) and 1:5 (C) ratios of PRL-3 to TP showed no binding. Upon addition of TP, PRL-3 was converted to the oxidized form but no other changes indicative of an interaction were observed. Peaks corresponding to oxidized PRL-3 are marked with asterisks.

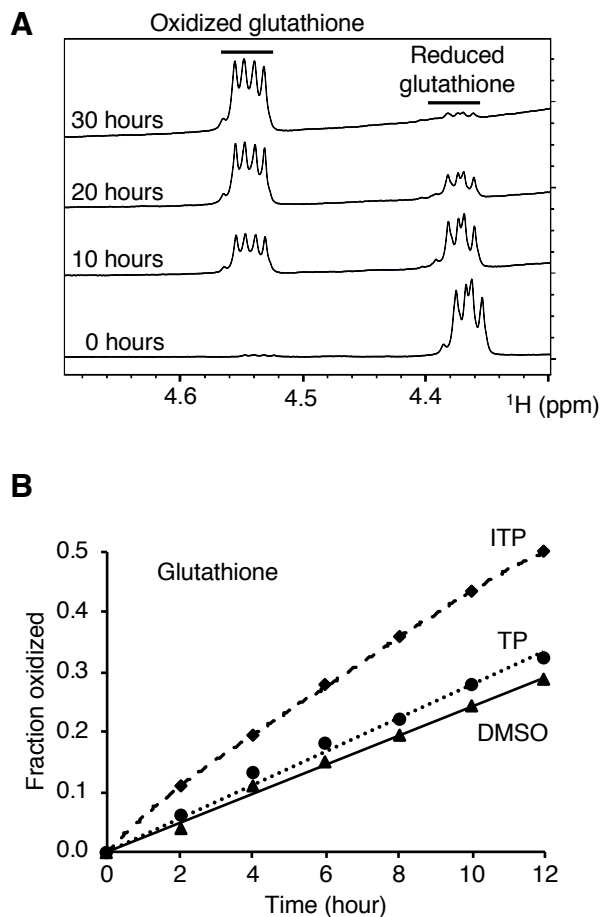

**Figure S2. Oxidation of glutathione by TP and ITP.** (A)  $^1\text{H}$  NMR of reduced glutathione (10 mM) incubated with ITP (1 mM) in 80%  $\text{d}_6\text{-DMSO}$  and 20%  $\text{D}_2\text{O}$ . (B) Fraction of oxidized glutathione obtained from NMR peak integration showing the increase in oxidation of glutathione.

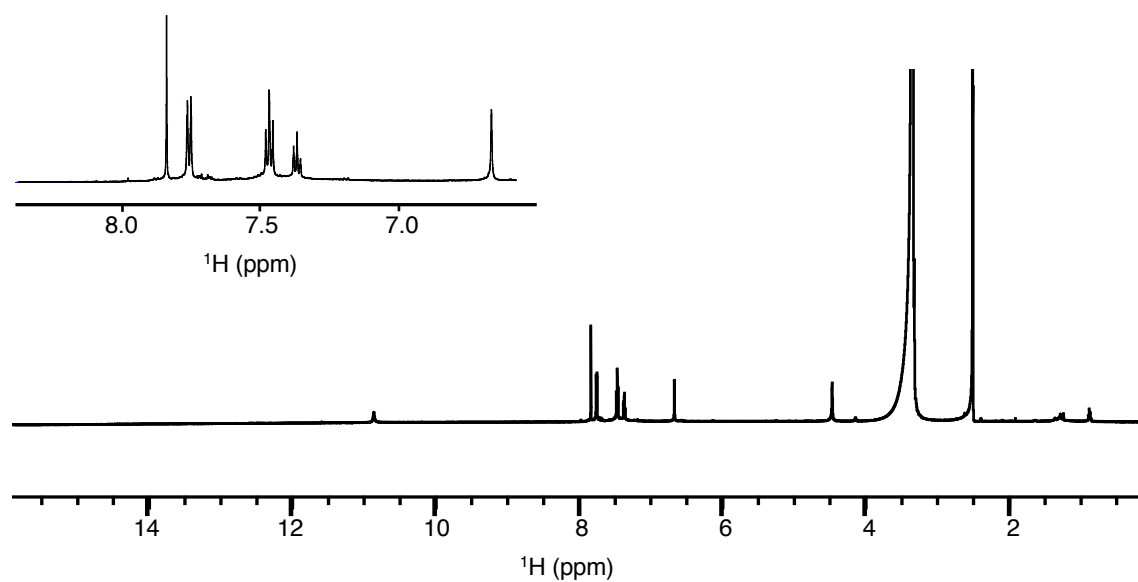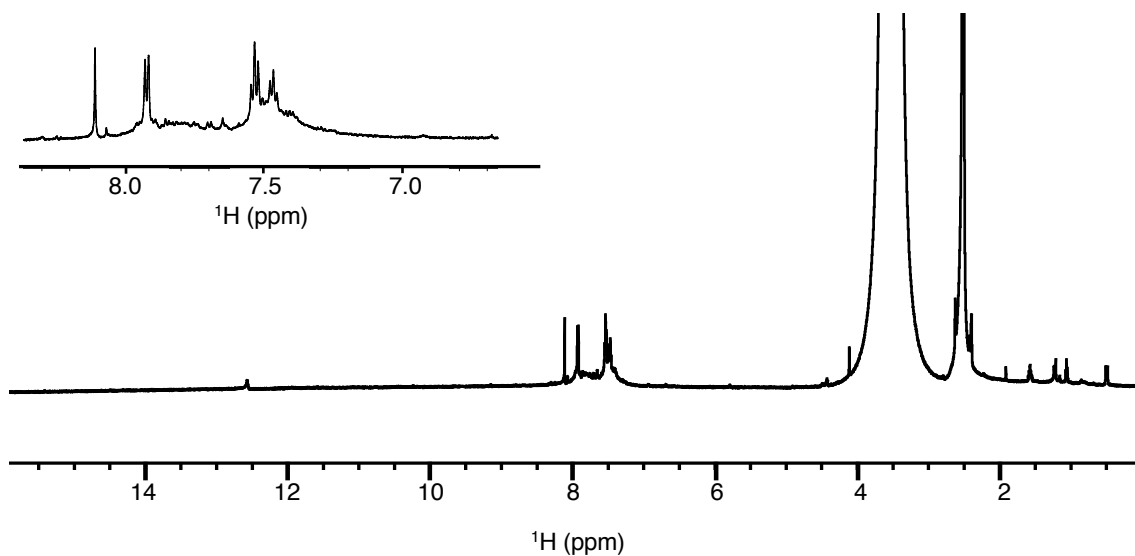

**Figure S3.**  $^1\text{H}$  NMR of TP and ITP to confirm identity and purity of the reagents. The 1D NMR spectra were obtained for TP (*upper panel*) and ITP (*lower panel*) in 100%  $\text{d}_6$ -DMSO at 30  $^\circ\text{C}$ .
